# Supplementary material for: Long-Term Effects of Altered Photoperiod During Pregnancy on Liver Gene Expression of the Progeny
Source: Front Physiol. 2019 Nov 22;10:1377. doi: 10.3389/fphys.2019.01377 (PMC6883370; doi:10.3389/fphys.2019.01377)
Supplement: Supplementary file 4 [file Data_Sheet_3.csv]

LD	8_1	8_2	8_3	12_1	12_2	12_3	16_1	16_2	16_3	20_1	20_2	20_3	24_1	24_2	24_3	28_1	28_2	28_3
PAI-1_ protein	386,48	392,39	401,57	380,58	402,89	388,45	461,29	443,57	382,55	656,17	568,24	427,82	556,43	937,66	477,69	722,44	1261,81	549,21
